# Supplementary material for: Signatures of Adaptation in Mitochondrial Genomes of the Palearctic Subterranean Voles (Arvicolinae, Rodentia)
Source: Preprints.org preprint supplement (doi:10.20944/preprints202110.0281.v1), 2021-10-19
Supplement: Supplementary file 1 [file supplementary]

## Sheet: Table S2
Table S2. Estimation of ω in ete-toolkit using a branch model. Fg - foreground branch (subterranean species), Bg - background branch (aboveground species). Subterranean species indicated by color on Figure 1. LRT - likelihood ratio test p-value for models comparison, M0 - one-ratio model, b_fee - free-branch model, b_neut - neutral model. All p-values given after Holm adjustment. 'N/A' indicates …
	Gene	ATP6	ATP8	COX1	COX2	COX3	CYTB	ND1	ND2	ND3	ND4	ND4L	ND5	ND6
Ellobius	Fg, ω1	0.1323	0.7389	0.0325	0.2165	0.0872	0.0598	0.0636	0.1325	0.1185	0.0949	0.1794	0.0982	0.1494
	Bg, ω0	0.0391	0.1625	0.009	0.0216	0.0435	0.0211	0.0286	0.084	0.0572	0.0446	0.0382	0.069	0.0839
	P_LRT b_free & M0	3.43E-04	0.0052	5.04E-05	1.17E-09	0.057	3.74E-04	0.0125	0.1267	0.1267	0.0017	0.0051	0.1267	0.1267
	P_LRT b_free & b_neut	1.326E-22	0.343503	5.746E-96	5.16E-11	1.316E-31	7.568E-59	5.085E-43	8.96E-34	1.216E-11	5.11E-49	1.41E-06	9.36E-76	6.9E-15
P. schaposchnikowi & Group F	Fg, ω1	N/A	0.9031	0.1379	N/A	0.0508	0.0476	0.0415	N/A	0.0626	0.0451	0.0085	0.0705	2.0721
	Bg, ω0	0.015	0.1531	0.0079	0.0064	0.0124	0.0205	0.0298	0.0484	0.0268	0.0314	0.0172	0.0368	0.0519
	P_LRT b_free & M0	--	0.051916	0.052857	--	0.013629	0.0959	1	--	1	1	1	0.0944	1
	P_LRT b_free & b_neut	--	1	1	--	0.32123	1	1	--	1	1	1	0.912	1
P. schaposchnikowi & Group E	Fg, ω1	N/A	0.3763	0.0293	0.0232	0.0549	0.0495	0.0593	1.7922	0.0001	0.0954	0.0001	0.0001	0.6807
	Bg, ω0	0.0344	0.2694	0.0102	0.0287	0.0194	0.0279	0.021	0.0847	0.0674	0.057	0.1008	0.0518	0.0447
	P_LRT b_free & M0	--	1	1	1	0.1548	0.81603	0.40596	1	0.988043	0.89728	0.19184	1	1
	P_LRT b_free & b_neut	--	1	1	1	1	1	1	1	1	1	0.22672	1	1
L. mandarinus	Fg, ω1	0.138	0.1839	0.036	0.1078	0.1174	0.234	0.075	0.1977	0.2344	0.1646	0.0996	0.1788	0.0536
	Bg, ω0	0.0754	0.2401	0.0228	0.0388	0.0283	0.0281	0.0195	0.085	0.1161	0.0724	0.0732	0.0684	0.121
	P_LRT b_free & M0	1	1	1	0.359512	0.0324	1.70E-04	0.56651	0.23697	1	0.1899	1	0.06798	1
	P_LRT b_free & b_neut	0.0002915	0.10314	1	4.004E-05	0.000132	0.3802	0.6327	0.002051	0.6327	0.000305	0.3802	0.001296	0.0007794
H. fertilis	Fg, ω1	1.2869	11.3402	3.9724	4.4523	10.0597	3.516	0.0089	N/A	N/A	0.1072	N/A	12.2994	N/A
	Bg, ω0	0.0217	0.1976	0.0074	0.0179	0.0326	0.0214	0.0265	0.0761	0.0189	0.0508	0.0363	0.0616	0.1035
	P_LRT b_free & M0	1	1	1	1	1	1	0.1911	--	--	1	--	1	--
	P_LRT b_free & b_neut	1	1	1	1	1	1	0.1911	--	--	1	--	1	--
Terricola	Fg, ω1	0.0414	0.1262	0.0178	0.0363	0.0276	0.0151	0.0214	0.0874	0.1045	0.0624	0.0459	0.0714	0.0155
	Bg, ω0	0.0268	0.0646	0.0252	0.0266	0.0451	0.0321	0.0352	0.0951	0.0881	0.0705	0.0839	0.0546	0.0539
	P_LRT b_free & M0	1	1	1	1	1	1	1	1	1	1	1	1	0.467634
	P_LRT b_free & b_neut	2.772E-22	6.59E-05	3.341E-51	3.46E-19	4.83E-24	4.642E-45	2.48E-43	2.968E-24	2.02E-06	1.62E-37	4.35E-09	8.796E-49	5.4E-22
